# Supplementary material for: Racial and Ethnic Disparities in Colorectal Cancer Incidence Trends Across Regions of the United States From 2001 to 2020 – A United States Cancer Statistics Analysis
Source: PubMed Central journal article supplement — Cancer Control. 2024 Nov 14;31:10732748241300653. doi: 10.1177/10732748241300653 (PMC11565617; doi:10.1177/10732748241300653), 2024-11-14

**Table S1.** Incidence rates for females and males for each study year, separately for Localized+Regional and Distant Summary Stages

| Summary Stage         | Year | Incidence Rate (95% CI) |                  |
|-----------------------|------|-------------------------|------------------|
|                       |      | Female                  | Male             |
| Localized or Regional | 2001 | 34.9 (34.6-35.2)        | 48.1 (47.7-48.5) |
|                       | 2002 | 34.2 (33.9-34.5)        | 47 (46.6-47.4)   |
|                       | 2003 | 33.3 (33-33.6)          | 46.1 (45.7-46.5) |
|                       | 2004 | 32.6 (32.3-32.9)        | 45 (44.6-45.4)   |
|                       | 2005 | 31.8 (31.5-32.1)        | 43.3 (43-43.7)   |
|                       | 2006 | 31.1 (30.8-31.4)        | 41.4 (41-41.8)   |
|                       | 2007 | 30.2 (29.9-30.5)        | 40.8 (40.4-41.1) |
|                       | 2008 | 29.3 (29.1-29.6)        | 39.2 (38.9-39.6) |
|                       | 2009 | 27.9 (27.6-28.2)        | 37 (36.7-37.3)   |
|                       | 2010 | 26.6 (26.3-26.8)        | 34.9 (34.6-35.3) |
|                       | 2011 | 25.8 (25.5-26)          | 34.1 (33.8-34.4) |
|                       | 2012 | 25 (24.7-25.2)          | 33 (32.7-33.3)   |
|                       | 2013 | 24.4 (24.2-24.6)        | 32.2 (31.9-32.5) |
|                       | 2014 | 24.5 (24.3-24.7)        | 32 (31.7-32.3)   |
|                       | 2015 | 24.3 (24.1-24.5)        | 31.8 (31.5-32.1) |
|                       | 2016 | 24.2 (24-24.4)          | 30.7 (30.5-31)   |
|                       | 2017 | 23.5 (23.2-23.7)        | 30.3 (30.1-30.6) |
|                       | 2018 | 23.2 (23-23.4)          | 29.6 (29.3-29.9) |
|                       | 2019 | 22.7 (22.5-23)          | 29.6 (29.3-29.9) |
|                       | 2020 | 19.8 (19.6-20)          | 25.3 (25.1-25.5) |
| Distant               | 2001 | 7.7 (7.5-7.8)           | 10.9 (10.7-11.1) |
|                       | 2002 | 7.6 (7.5-7.8)           | 10.7 (10.5-10.9) |
|                       | 2003 | 7.9 (7.8-8.1)           | 10.7 (10.5-10.9) |
|                       | 2004 | 7.9 (7.8-8.1)           | 10.7 (10.6-10.9) |
|                       | 2005 | 7.8 (7.7-8)             | 10.6 (10.4-10.7) |
|                       | 2006 | 7.8 (7.7-8)             | 10.3 (10.1-10.4) |
|                       | 2007 | 7.7 (7.5-7.8)           | 10.1 (9.9-10.2)  |
|                       | 2008 | 7.5 (7.4-7.7)           | 10.1 (9.9-10.3)  |
|                       | 2009 | 7.4 (7.2-7.5)           | 9.7 (9.6-9.9)    |
|                       | 2010 | 7.3 (7.2-7.4)           | 9.6 (9.4-9.8)    |
|                       | 2011 | 7.1 (7-7.2)             | 9.8 (9.6-9.9)    |
|                       | 2012 | 7.1 (7-7.2)             | 9.5 (9.3-9.6)    |
|                       | 2013 | 7.2 (7.1-7.4)           | 9.8 (9.6-9.9)    |
|                       | 2014 | 7.2 (7.1-7.3)           | 9.7 (9.5-9.8)    |
|                       | 2015 | 7.1 (7-7.3)             | 9.5 (9.4-9.7)    |
|                       | 2016 | 7 (6.9-7.1)             | 9.3 (9.2-9.5)    |
|                       | 2017 | 6.8 (6.6-6.9)           | 9.1 (9-9.3)      |
|                       | 2018 | 6.7 (6.6-6.8)           | 9.4 (9.3-9.6)    |
|                       | 2019 | 6.8 (6.7-6.9)           | 9.4 (9.2-9.5)    |
|                       | 2020 | 6.4 (6.2-6.5)           | 8.8 (8.6-8.9)    |

NOTES:

Rates are per 100,000 and age-adjusted to the 2000 US Std Population (19 age groups - Census P25-1130) standard; Confidence intervals (Tiwari 2006 mod) are 95% for rates.

**Table S2.** Incidence rates for racial/ethnic groups, estimated separately for Localized+Regional and Distant Summary Stages

| Summary Stage         | Year | Incidence Rate (95% CI) |                  |                  |                  |                  |
|-----------------------|------|-------------------------|------------------|------------------|------------------|------------------|
|                       |      | AIAN                    | API              | Hispanic         | NHB              | NHW              |
| Localized or Regional | 2001 | 30.5 (27.5-33.8)        | 32.5 (31.2-33.9) | 32.4 (31.5-33.4) | 42.3 (41.4-43.1) | 41.3 (41-41.6)   |
|                       | 2002 | 31.2 (28.2-34.5)        | 32 (30.8-33.3)   | 31.3 (30.5-32.2) | 42.2 (41.3-43)   | 40.4 (40.1-40.6) |
|                       | 2003 | 33.3 (30.1-36.6)        | 30.4 (29.2-31.6) | 31.2 (30.4-32.1) | 42.5 (41.7-43.4) | 39.3 (39-39.6)   |
|                       | 2004 | 29.9 (27-33)            | 30.5 (29.4-31.7) | 32.2 (31.4-33)   | 41.8 (41-42.6)   | 38.4 (38.1-38.6) |
|                       | 2005 | 29.5 (26.7-32.5)        | 29 (28-30.1)     | 30.7 (29.9-31.5) | 40.4 (39.6-41.2) | 37.3 (37.1-37.6) |
|                       | 2006 | 32.3 (29.3-35.4)        | 29 (28-30.1)     | 30.4 (29.6-31.2) | 39.9 (39.2-40.7) | 35.9 (35.7-36.1) |
|                       | 2007 | 32.6 (29.7-35.7)        | 28.2 (27.2-29.2) | 29.9 (29.1-30.6) | 38.8 (38-39.5)   | 35.2 (34.9-35.4) |
|                       | 2008 | 29.9 (27.2-32.8)        | 28.2 (27.3-29.2) | 29.1 (28.4-29.8) | 38.3 (37.6-39)   | 33.9 (33.7-34.2) |
|                       | 2009 | 29.3 (26.7-32.1)        | 26.4 (25.5-27.3) | 28.2 (27.5-28.9) | 36.5 (35.8-37.2) | 32.1 (31.9-32.3) |
|                       | 2010 | 29.4 (26.9-32.1)        | 25.8 (25-26.7)   | 26.2 (25.6-26.8) | 35 (34.3-35.6)   | 30.4 (30.2-30.6) |
|                       | 2011 | 29.6 (27.1-32.2)        | 25.5 (24.6-26.3) | 25.9 (25.3-26.5) | 33.5 (32.8-34.2) | 29.7 (29.4-29.9) |
|                       | 2012 | 27.9 (25.5-30.4)        | 24.1 (23.3-24.9) | 24.6 (24-25.2)   | 31.9 (31.3-32.6) | 29 (28.8-29.2)   |
|                       | 2013 | 28.5 (26.1-31)          | 23 (22.3-23.8)   | 24.5 (23.9-25)   | 31.5 (30.9-32.1) | 28.3 (28-28.5)   |
|                       | 2014 | 27.4 (25.1-29.8)        | 22.7 (21.9-23.4) | 24.6 (24-25.1)   | 30.8 (30.2-31.4) | 28.4 (28.2-28.6) |
|                       | 2015 | 30.5 (28.2-33)          | 22.3 (21.6-23.1) | 24.4 (23.8-24.9) | 30.5 (29.9-31.1) | 28.3 (28-28.5)   |
|                       | 2016 | 30.2 (28-32.6)          | 22.5 (21.8-23.2) | 23.6 (23.1-24.2) | 28.9 (28.3-29.4) | 27.9 (27.7-28.1) |
|                       | 2017 | 28.8 (26.6-31.1)        | 21.9 (21.2-22.6) | 23.4 (22.9-23.9) | 28 (27.5-28.6)   | 27.4 (27.2-27.6) |
|                       | 2018 | 27.4 (25.3-29.6)        | 21.2 (20.5-21.8) | 23.1 (22.6-23.6) | 28 (27.4-28.5)   | 26.8 (26.6-27.1) |
|                       | 2019 | 25.8 (23.8-27.9)        | 20.7 (20.1-21.3) | 22.5 (22-22.9)   | 27.3 (26.8-27.8) | 26.8 (26.6-27)   |
|                       | 2020 | 23.2 (21.3-25.1)        | 17 (16.5-17.6)   | 19 (18.6-19.4)   | 23.1 (22.7-23.6) | 23.4 (23.2-23.6) |
| Distant               | 2001 | 8.7 (7.1-10.5)          | 7 (6.4-7.6)      | 7.7 (7.3-8.2)    | 12.2 (11.8-12.7) | 8.9 (8.8-9)      |
|                       | 2002 | 7.5 (6.1-9.2)           | 7.4 (6.8-8)      | 7.7 (7.3-8.1)    | 12.7 (12.3-13.2) | 8.7 (8.6-8.8)    |
|                       | 2003 | 7.5 (6.1-9.1)           | 7.2 (6.6-7.8)    | 7.9 (7.5-8.3)    | 12.9 (12.4-13.3) | 8.9 (8.8-9)      |
|                       | 2004 | 8 (6.6-9.7)             | 6.6 (6.1-7.2)    | 7.9 (7.5-8.3)    | 13.1 (12.6-13.5) | 9 (8.8-9.1)      |
|                       | 2005 | 8.3 (6.8-9.9)           | 7.3 (6.8-7.9)    | 8 (7.6-8.4)      | 13.2 (12.8-13.7) | 8.7 (8.6-8.9)    |
|                       | 2006 | 7.5 (6.2-9)             | 6.8 (6.3-7.3)    | 8.4 (8-8.8)      | 12.8 (12.3-13.2) | 8.6 (8.5-8.7)    |
|                       | 2007 | 9 (7.6-10.7)            | 6.8 (6.3-7.3)    | 7.6 (7.3-8)      | 12.6 (12.2-13)   | 8.5 (8.4-8.6)    |
|                       | 2008 | 8.9 (7.4-10.5)          | 6.7 (6.2-7.2)    | 7.7 (7.4-8.1)    | 12.3 (11.9-12.7) | 8.5 (8.4-8.6)    |
|                       | 2009 | 8.7 (7.4-10.3)          | 6.7 (6.2-7.2)    | 7.5 (7.1-7.8)    | 12.2 (11.8-12.6) | 8.2 (8.1-8.3)    |
|                       | 2010 | 9.1 (7.7-10.6)          | 6.7 (6.3-7.2)    | 7.2 (6.8-7.5)    | 11.6 (11.2-12)   | 8.2 (8.1-8.3)    |
|                       | 2011 | 8.3 (7-9.8)             | 6.3 (5.8-6.7)    | 7.6 (7.2-7.9)    | 11.3 (10.9-11.7) | 8.2 (8.1-8.3)    |
|                       | 2012 | 8.4 (7.1-9.8)           | 5.8 (5.4-6.2)    | 7.3 (7-7.6)      | 11.7 (11.3-12)   | 8 (7.9-8.1)      |
|                       | 2013 | 9.2 (7.9-10.6)          | 6.3 (5.9-6.7)    | 7.3 (7-7.6)      | 11.7 (11.3-12)   | 8.3 (8.1-8.4)    |
|                       | 2014 | 9.3 (8-10.7)            | 6.5 (6.1-6.9)    | 7.3 (7-7.6)      | 11.6 (11.2-11.9) | 8.2 (8.1-8.3)    |
|                       | 2015 | 9.1 (7.9-10.5)          | 6 (5.6-6.3)      | 7.3 (7-7.6)      | 11 (10.7-11.4)   | 8.2 (8.1-8.3)    |
|                       | 2016 | 10.4 (9.1-11.8)         | 5.9 (5.6-6.3)    | 7.3 (7-7.5)      | 11.1 (10.8-11.5) | 7.9 (7.8-8)      |
|                       | 2017 | 9.8 (8.6-11.2)          | 5.6 (5.2-5.9)    | 7.3 (7.1-7.6)    | 10.4 (10.1-10.7) | 7.8 (7.7-7.9)    |
|                       | 2018 | 8.4 (7.3-9.6)           | 5.6 (5.3-6)      | 7.1 (6.8-7.3)    | 10.5 (10.2-10.9) | 8 (7.8-8.1)      |
|                       | 2019 | 8.6 (7.5-9.9)           | 6.1 (5.8-6.5)    | 7.1 (6.9-7.4)    | 10.6 (10.3-10.9) | 8 (7.8-8.1)      |
|                       | 2020 | 8.5 (7.4-9.8)           | 5.7 (5.4-6)      | 6.6 (6.4-6.8)    | 9.5 (9.2-9.8)    | 7.5 (7.4-7.6)    |

NOTES:

Rates are per 100,000 and age-adjusted to the 2000 US Std Population (19 age groups - Census P25-1130) standard; Confidence intervals (Tiwari 2006 mod) are 95% for rates.

**Figure S1.** Trends in Localized or Regional and Distant summary stage CRC incidence rates, separately for females and males. Rates are per 100,000 and age-adjusted to the 2000 US Std Population (19 age groups - Census P25-1130) standard. Estimates were obtained from the results of the meta-regression linear models analyses.

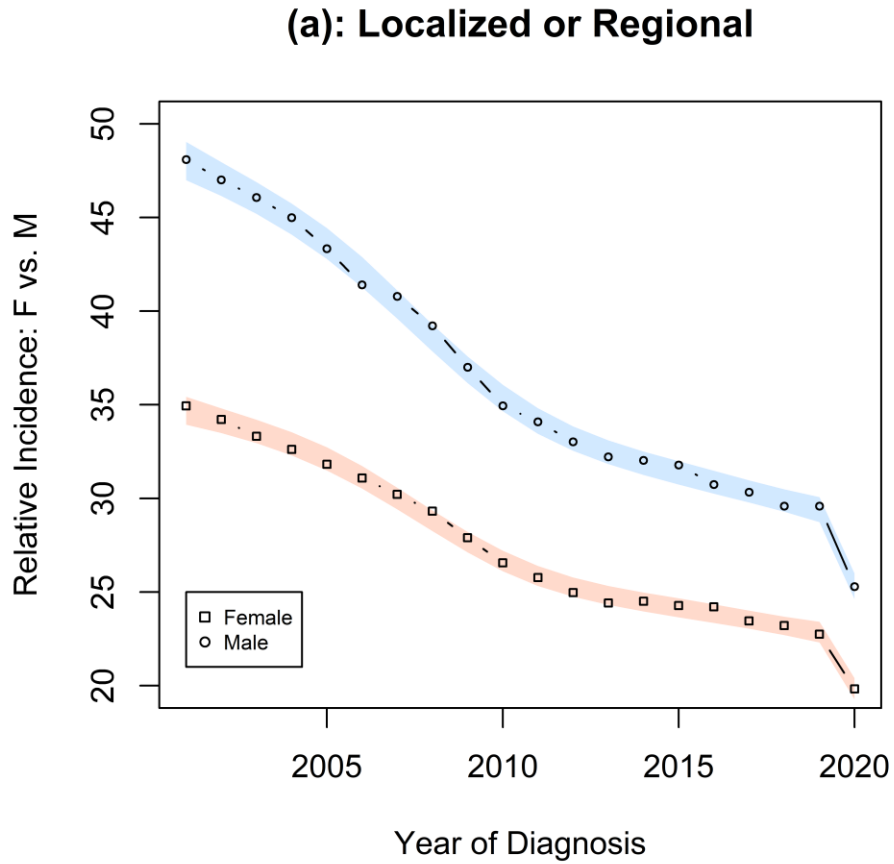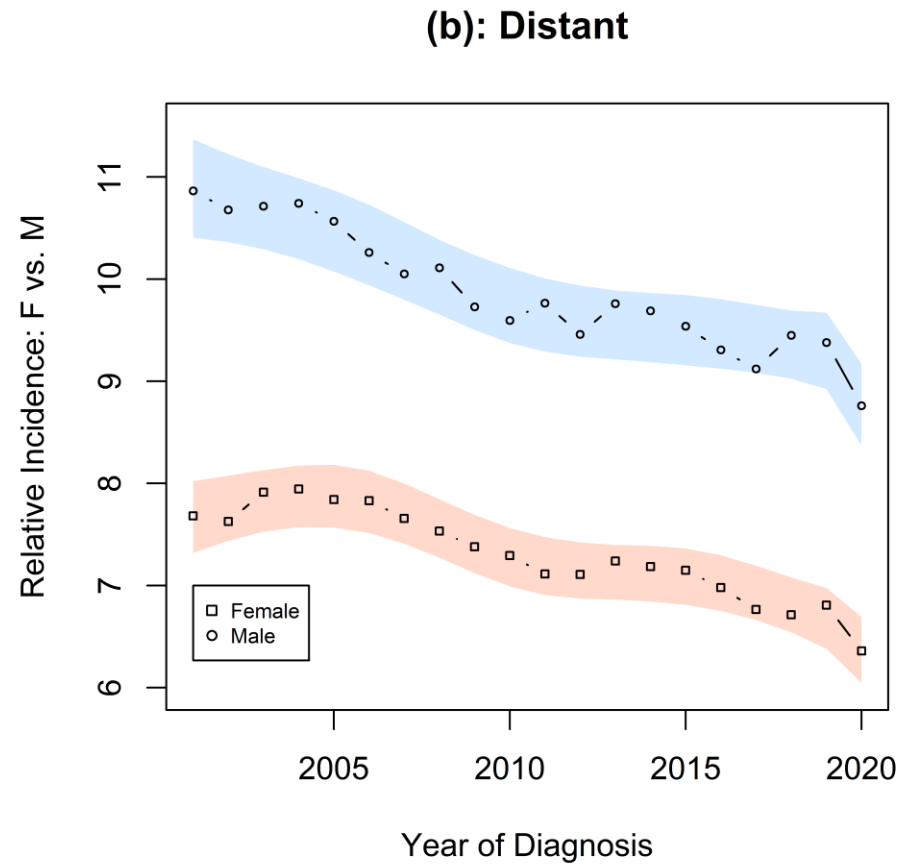

**Figure S2.** Trends in Localized or Regional and Distant summary stage CRC incidence rates, separately for different racial/ethnic groups. Rates are per 100,000 and age-adjusted to the 2000 US Std Population (19 age groups - Census P25-1130) standard. Estimates were obtained from the results of the meta-regression linear models analyses.

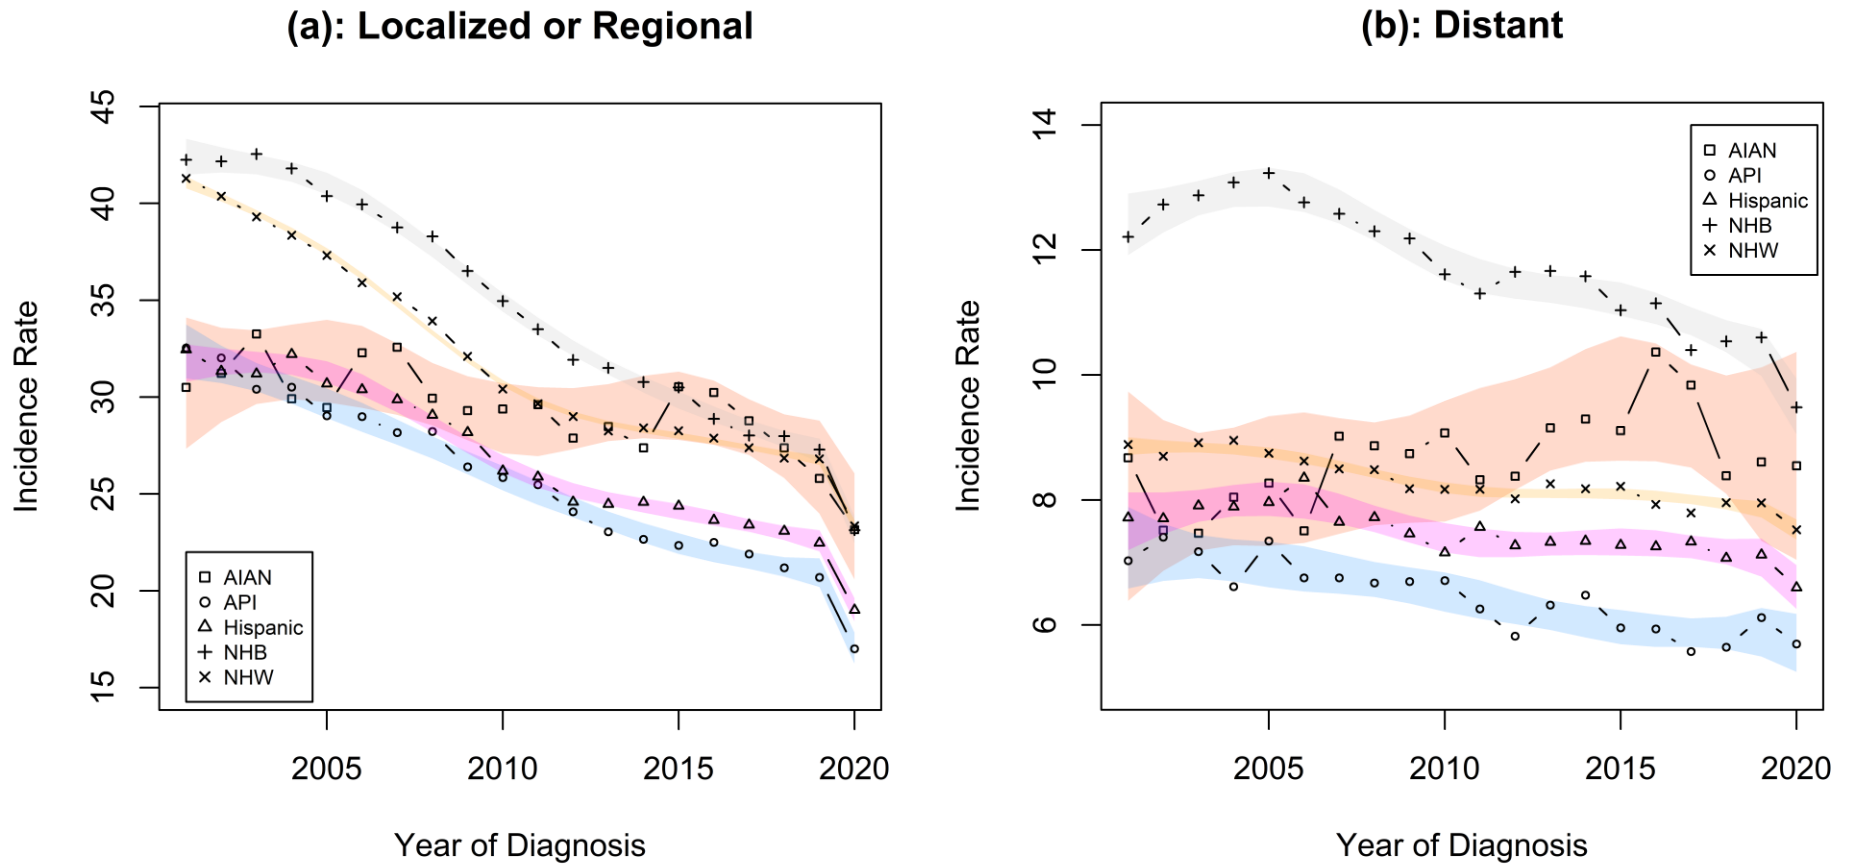

Supplement: sj-pdf-2-ccx-10.1177_10732748241300653.pdf [file sj-pdf-2-ccx-10.1177_10732748241300653.pdf]
